# Supplementary material
Source: Springer Nature journal article supplement (https://www.springermedizin.de/resource/supplementary/13099_2009_14_MOESM5_ESM.pdf/9665330)
Supplement: MOESM5 [file 9665330]

**(A) 37°C**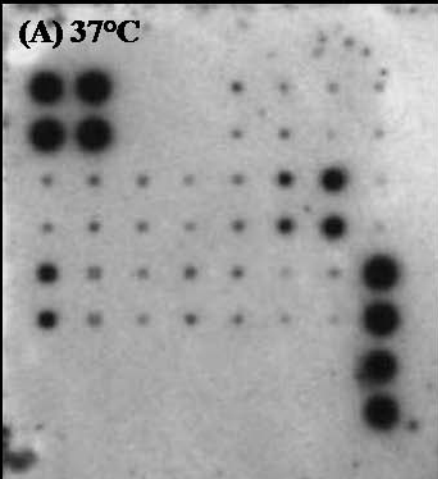**(B) 37°C + ST**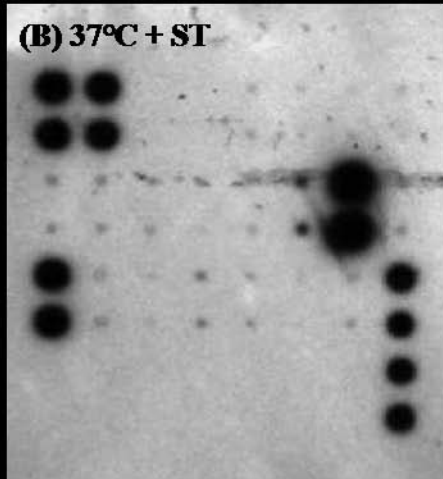**(C) 41°C**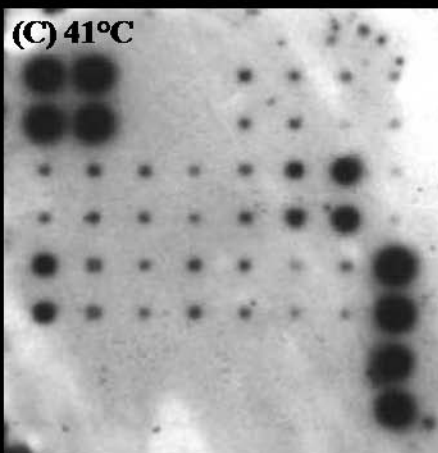**(D) 41°C + ST**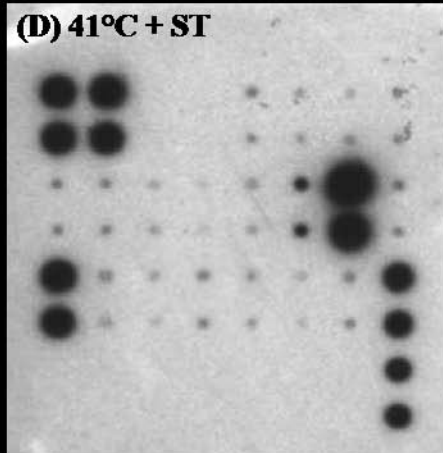

| Pos           | Pos           | Neg          | Neg   | Estaxin | Estaxin-2 | GCSEF | GM-CSEF |
|---------------|---------------|--------------|-------|---------|-----------|-------|---------|
| Pos           | Pos           | Neg          | Neg   | Estaxin | Estaxin-2 | GCSEF | GM-CSEF |
| IFN- $\gamma$ | IL-1 $\alpha$ | IL-1 $\beta$ | IL-2  | IL-3    | IL-4      | IL-6  | IL-7    |
| IFN- $\gamma$ | IL-1 $\alpha$ | IL-1 $\beta$ | IL-2  | IL-3    | IL-4      | IL-6  | IL-7    |
| IL-8          | IL-10         | IL-11        | IL-12 | IL-12   | IL-13     | I-309 | TIMP-2  |
| IL-8          | IL-10         | IL-11        | IL-12 | IL-12   | IL-13     | I-309 | TIMP-2  |
| B             | B             | B            | B     | B       | B         | Neg   | Pos     |
| B             | B             | B            | B     | B       | B         | Neg   | Pos     |
